# Supplementary material for: On the role of four small hairpins in the HIV-1 RNA genome
Source: PubMed Central journal article supplement — RNA Biol. 2013 Mar 27;10(4):540–52. doi: 10.4161/rna.24133 (PMC3710360; doi:10.4161/rna.24133), 2013-03-27
Supplement: rna-10-540-s01.pdf [file rna-10-540-s01.pdf]

## **Supplemental Material to:**

**Stefanie A. Knoepfel and Ben Berkhout**

**On the role of four small hairpins in the HIV-1 RNA  
genome**

**2012; 10(4)**

**<http://dx.doi.org/10.4161/rna.24133>**

**[www.landesbioscience.com/journals/rnabiology/article/24133/](http://www.landesbioscience.com/journals/rnabiology/article/24133/)**

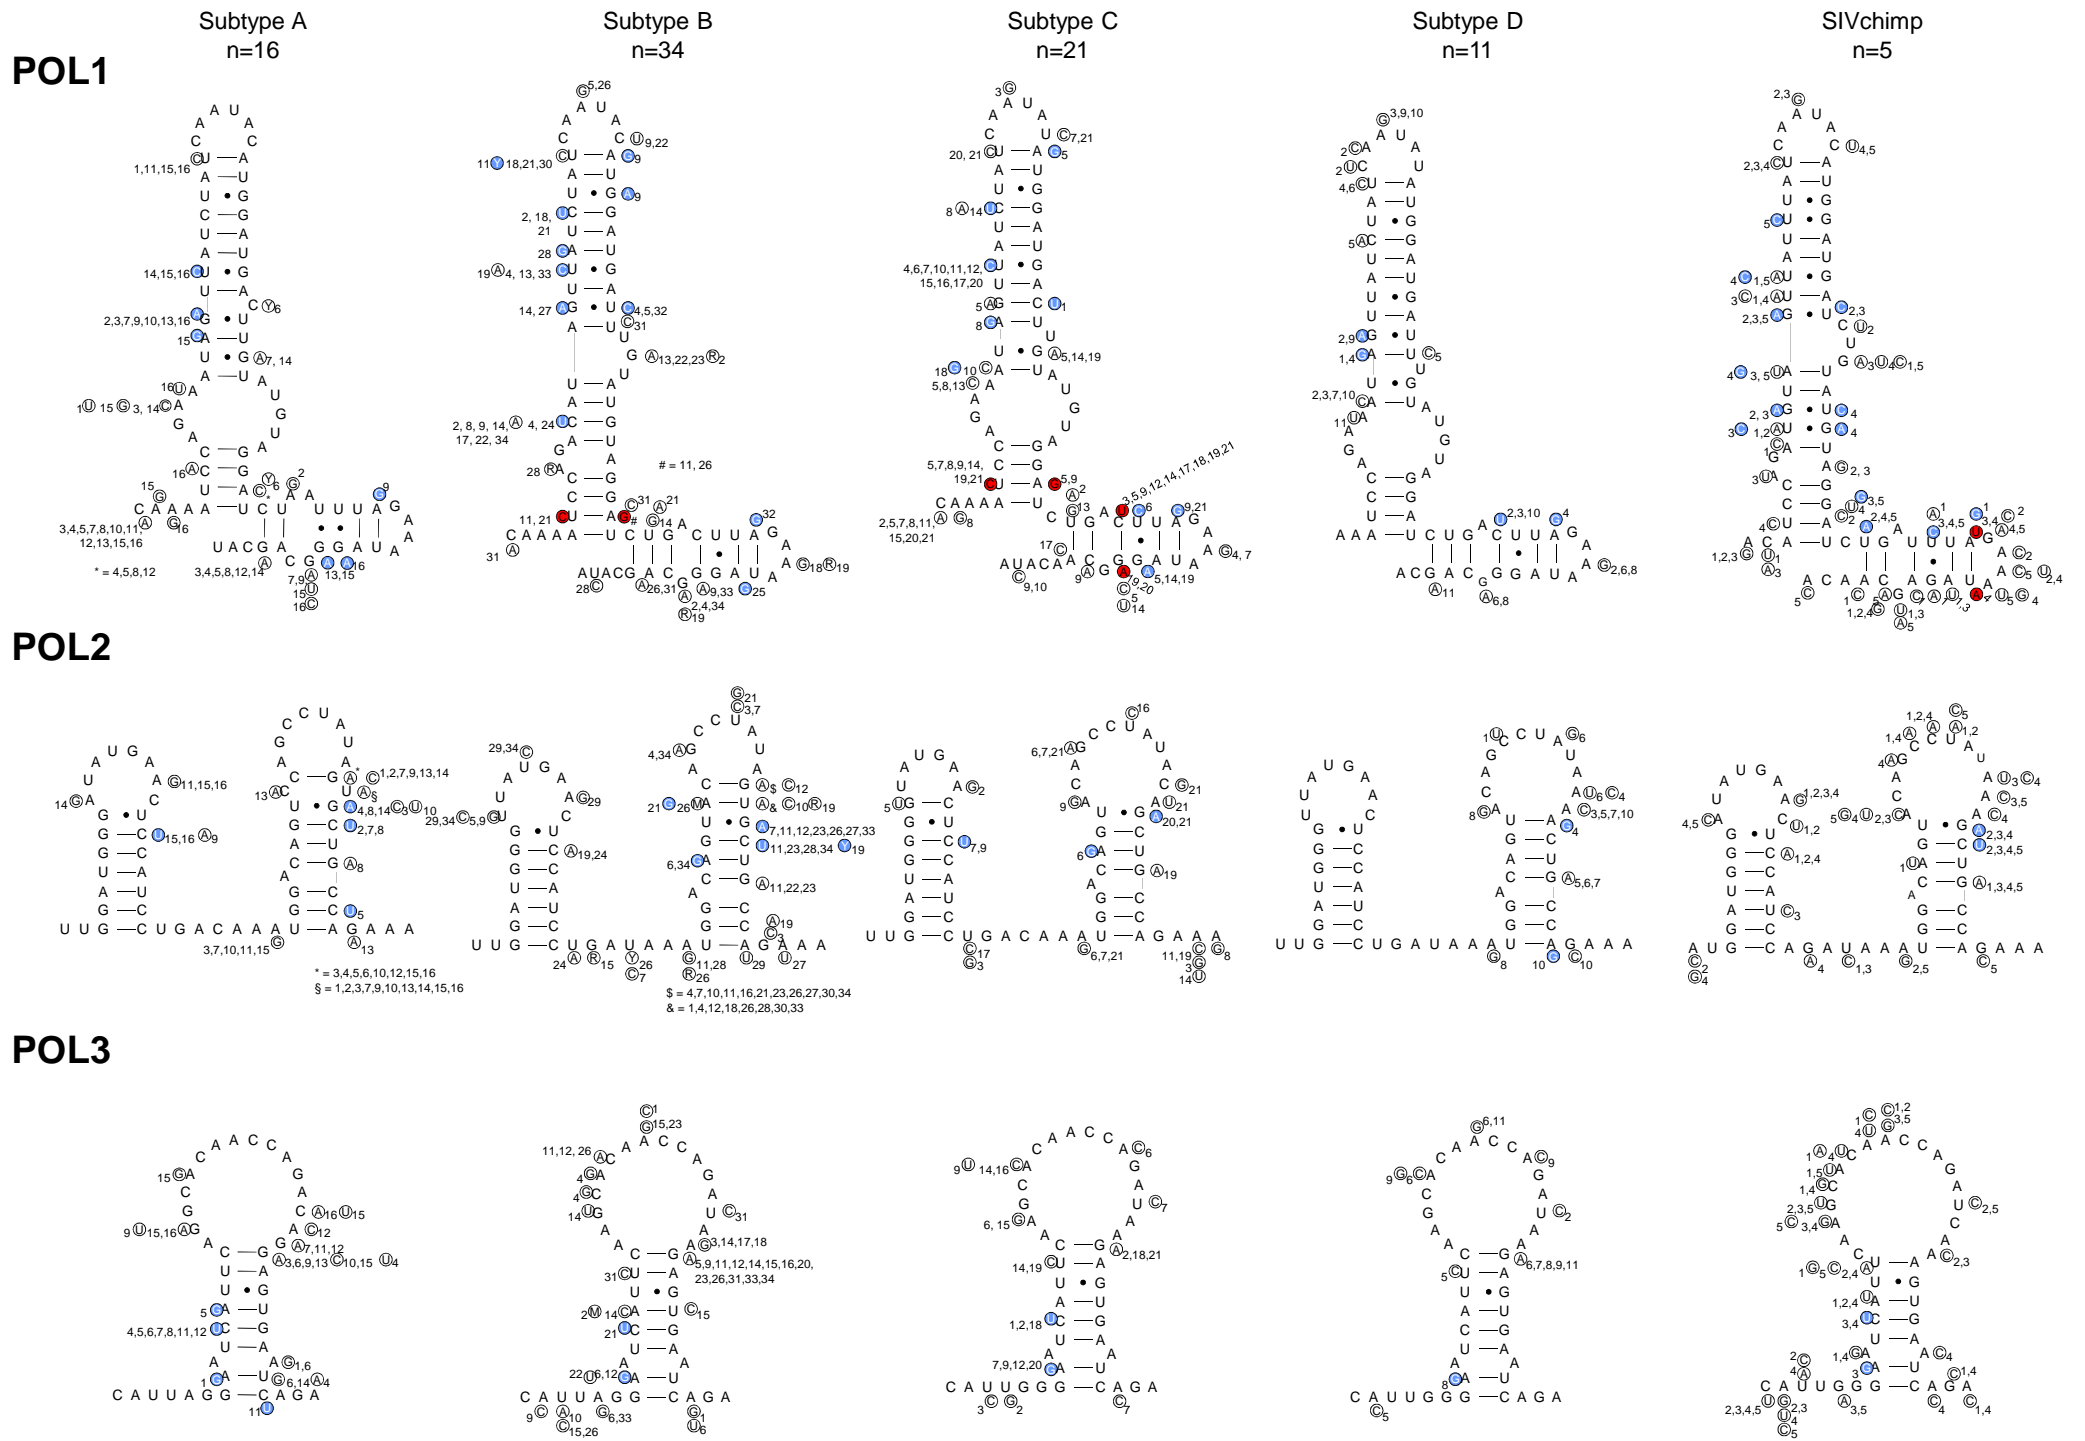

Figure S1

# NEF1

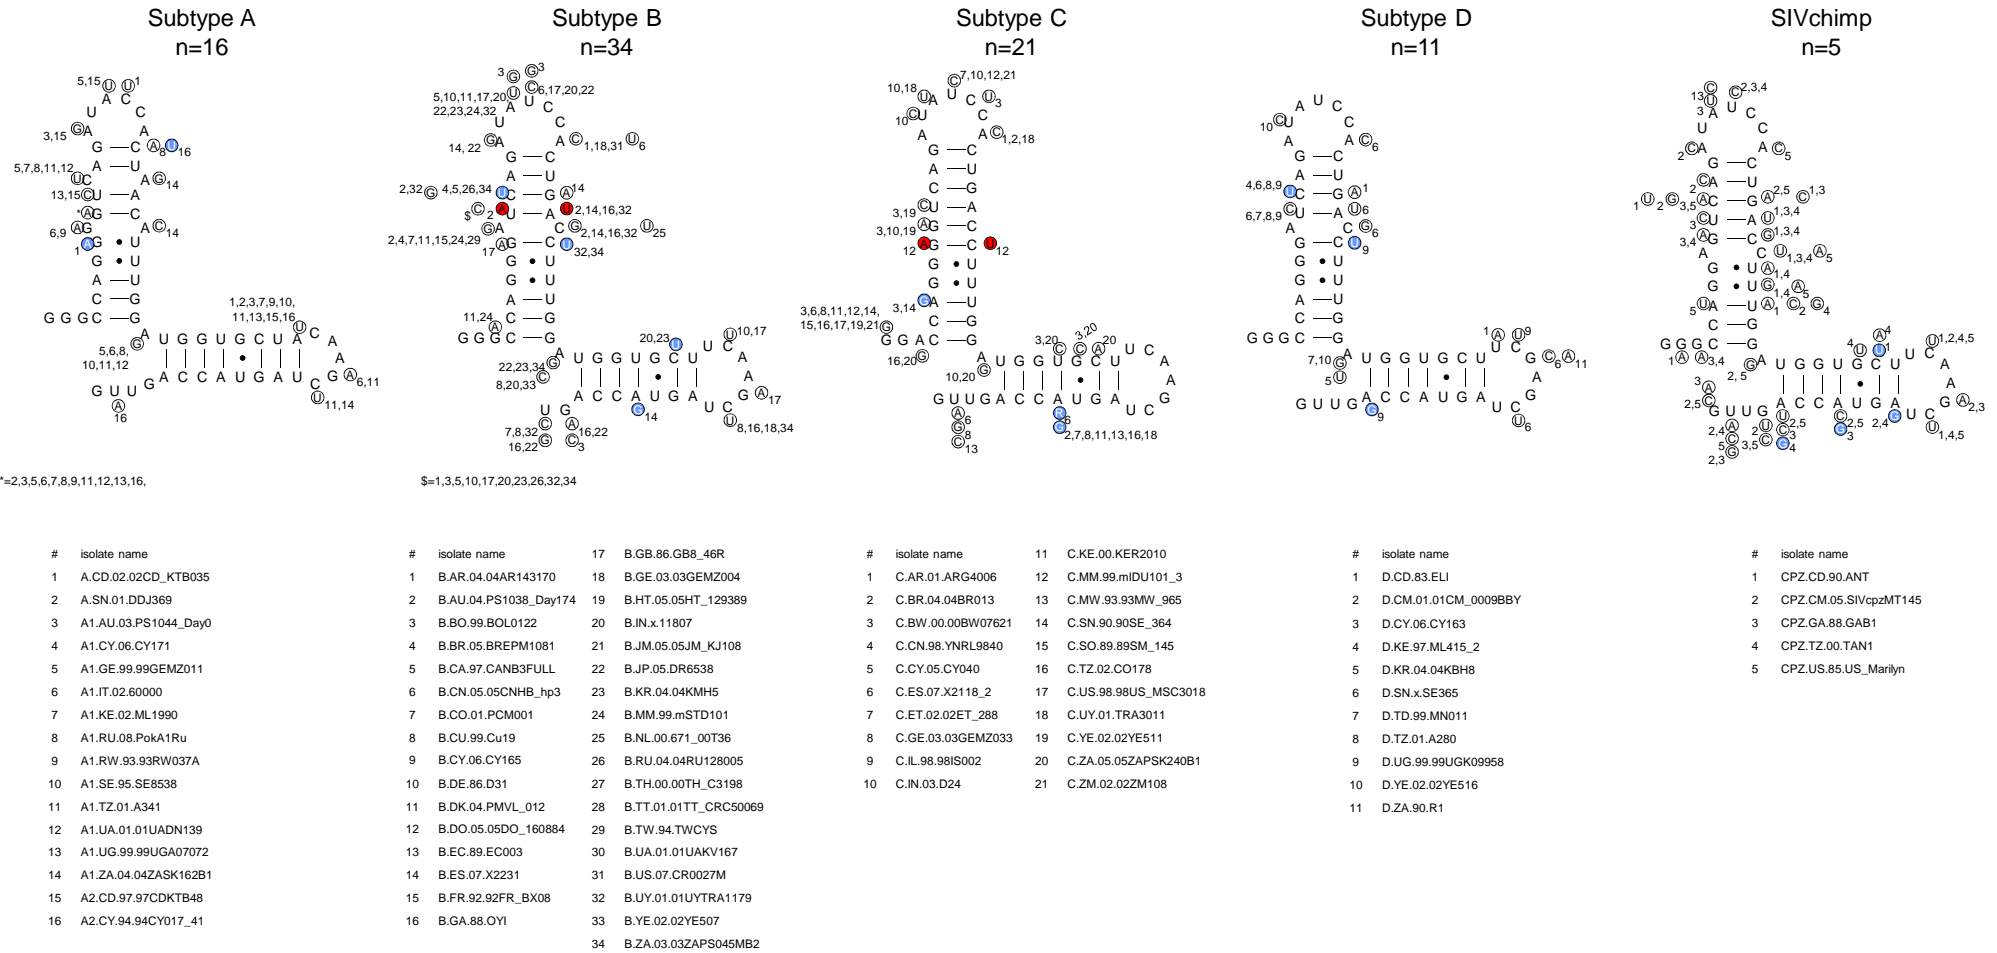

Figure S1. The impact of natural sequence variation on the POL1, POL2, POL3 and NEF1 motifs. Sequences of the HIV compendium 2010 were analyzed for HIV-1 subtypes A, B, C, D and SIVcpz. The major sequence is depicted for each subtype with variations in small circles with a number that refers to the particular isolate. Blue circles mark changes on one RNA strand that consume the structure, red circles represent base pair co-variation.
